# Supplementary material for: Smoking cessation using preference-based tools among socially disadvantaged smokers: study protocol for a pragmatic, multicentre randomised controlled trial
Source: HighWire-hosted journal article supplement (doi:10.1136/bmjopen-2021-048859), 2021-06-01
Supplement: bmjopen-2021-048859supp001_data_supplement.pdf [file bmjopen-2021-048859supp001_data_supplement.pdf]

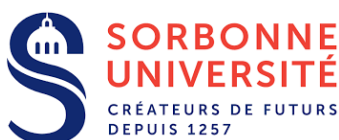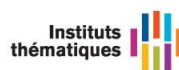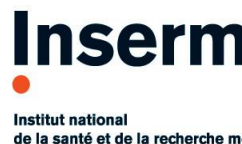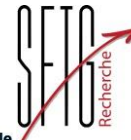

**NOTICE D'INFORMATION ET FORMULAIRE DE CONSENTEMENT À DESTINATION DES PARTICIPANT(E)S**

**RECHERCHE IMPLIQUANT LA PERSONNE HUMAINE**

**VOLET QUANTITATIF**

**STOP : Sevrage Tabagique à l'aide des Outils dédiés selon la Préférence, l'essai randomisé contrôlé pragmatique**

Version N°2 du 23/06/2020

| N°SFTG   | N°ID RCB       | N° CPP                   |
|----------|----------------|--------------------------|
| STOP-001 | 2020-A00146-33 | 20.01.31.65528 RIPH2 HPS |

**1. INFORMATION A L'ATTENTION DU (DE LA) PARTICIPANT(E)**

Madame, Monsieur,

Vous êtes invité(e) à participer à une recherche impliquant la personne humaine dont la société de formation thérapeutique du généraliste (SFTG), (SFTG, 233 bis rue de Tolbiac, 75013) est le promoteur.

Cette recherche intitulée « Sevrage Tabagique à l'aide des Outils dédiés selon la Préférence. (STOP), un essai randomisé contrôlé » est coordonnée par la Dr Gladys Ibanez (Présidente de la SFTG recherche, et maitresse de conférence à la Sorbonne université, gladys.ibanez@sorbonne-universite.fr), et trois chercheur.se.s en épidémiologie Maria Melchior, Fabienne El Khoury et Tarik El Aarbaoui de l'Équipe de Recherche en Épidémiologie Sociale, à la Sorbonne université l'Institut Pierre Louis d'Épidémiologie et de Santé Publique, IPLESP INSERM UMR\_S 1136 (27 rue de Chaligny, 75012, 01 85 56 02 43 ; stop@iplesp.upmc.fr).

**1.1. INFORMATION**

Ce document a pour but de vous fournir les informations écrites nécessaires à votre décision. Nous vous remercions de le lire attentivement.

N'hésitez pas à poser des questions à votre médecin ou à l'équipe investigatrice (les chercheur.se.s à la Sorbonne université) citées ci-dessus, si vous voulez plus d'informations. Ils sont à votre disposition pour vous présenter la recherche et la façon dont vous pouvez y participer, pour répondre à toutes vos questions et pour vous expliquer ce que vous ne comprenez pas. Vous pouvez prendre le temps pour réfléchir à votre participation à cette recherche.

En fin de ce document, si vous acceptez de participer à cette étude, votre médecin vous demandera de compléter l'emplacement qui vous est réservé en y apposant votre signature et la date de votre consentement.

**1.2. CONSENTEMENT**

**Votre participation est volontaire : vous êtes libre d'accepter ou de refuser de participer à cette recherche impliquant la personne humaine.**

Si vous décidez de participer, sachez que **vous pourrez retirer à tout moment votre consentement à la recherche**, sans encourir aucune responsabilité ni aucun préjudice de ce fait. Cela ne changera en rien les rapports que vous avez avec votre médecin ou votre équipe soignante. Nous vous demanderons simplement de les en informer. Vous n'aurez pas à justifier votre décision.

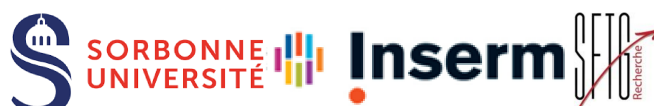

### 1.3. CADRE GENERAL ET OBJECTIFS DE LA RECHERCHE

L'étude STOP (Sevrage Tabagique à l'aide d'Outils dédiés selon la Préférence) examine l'efficacité d'un accompagnement au sevrage tabagique par des médecins chez des personnes en situation socio-économique défavorable (au chômage ou bénéficiant des allocations sociales), vis-à-vis de l'arrêt du tabac à 6 mois.

#### DEROULEMENT DE LA RECHERCHE

##### Lieu et adresse de la recherche

Le patient/Volontaire se déplacent dans le centre où la recherche aura lieu à l'adresse :

Les patients seront randomisés en 2 groupes afin de comparer deux différentes approches d'accompagnement à l'arrêt du tabac. Les patients dans les 2 groupes recevront les soins habituellement utilisés par les médecins.

L'accompagnement au sevrage se déroulera en plusieurs rendez-vous (au moins 3, répartis sur 6 mois selon vos disponibilités) d'environ 20 à 30 minutes:

##### → 1<sup>er</sup> rendez-vous

Après avoir lu, accepté et signé ce formulaire, votre médecin vous posera des questions sur votre consommation de tabac, votre exposition au tabac (tabagisme passif), et autres facteurs qui sont dans certains cas, liés au fait de fumer, comme la consommation d'alcool et du cannabis.

D'autres questions sur vos habitudes de vie et votre état moral et physique seront aussi posées, ces informations aideront votre médecin à comprendre vos motivations à l'arrêt ou à la réduction du tabac, et les obstacles que vous rencontrez

Ensuite, votre médecin vous donnera des conseils pour l'arrêt du tabac, et décidera avec vous d'une démarche adéquate pour l'arrêt du tabac.

Toutes les données sont collectées par votre médecin dans ce centre, à l'aide d'un pc portable ou une tablette, aujourd'hui (lors du premier rendez-vous) et lors des prochains rendez-vous. Les données seront stockées dans des serveurs basés en France et sécurisés selon la réglementation en vigueur.

Nous allons également vous fournir un agenda, sous forme de cartes postales pré-timbrées et libellées à l'adresse de l'équipe Sorbonne université. Nous vous demanderons d'y noter des informations sur votre consommation de tabac et nous envoyer une carte chaque mois.

##### → 2<sup>e</sup> Rendez-vous

Sept à 10 jours après votre premier rendez-vous (Nous prendrons en compte vos disponibilités pour fixer les rendez-vous), un 2<sup>e</sup> rendez-vous vous sera proposé. Ce dernier, servira à parler de votre expérience et vos appréciations concernant l'arrêt ou la réduction du tabac, **même si la réduction du tabac n'est pas réussie**.

On vous posera des questions sur :

- Votre statut tabagique
- L'usage éventuel des produits et outils qui aident à l'arrêt comme la cigarette électronique ou les substituts nicotines

On va aussi mesurer la quantité monoxyde de carbone expiré (CO), par analyseur de CO (un test de mesure de la respiration) qui ne nécessite aucun prélèvement biologique.

**Et si vous n'arrivez pas à réduire votre consommation du tabac entre temps? Ne perdez surtout pas espoir! Toutes les tentatives d'arrêt ne sont pas toujours réussies, spécialement du premier essai. Il faut revenir parler à votre médecin quand même, il ou elle pourra adapter ces conseils et proposer une autre méthode d'arrêt ou de réduction du tabac.**

##### → Rendez-vous suivants

Selon vos disponibilités et vos besoins, les mois qui suivent, vous allez revenir pour continuer votre suivi, avec un dernier rendez-vous à 6 mois. Les conseils et l'accompagnement s'adapteront à l'évolution de votre tabagisme, et de votre expérience et ressentis. ,

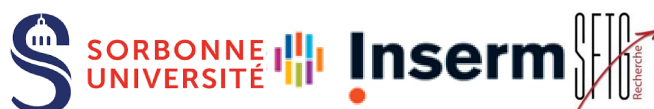

Les mêmes mesures (arrêt du tabac, nombre de cigarettes fumées, CO expirés,...) seront réalisées à chaque visite de suivi.

Il sera également possible, si vous le souhaitez, de vous appeler afin de suivre votre consommation de tabac par téléphone.

Aucune donnée directement identifiante (nom, adresse, numéro de téléphone,...) ne sera recueillie dans le cadre de la recherche médicale.

### 1.5. BENEFICES ATTENDUS

---

Cette étude permettra de comprendre si l'accompagnement testé est efficace et aide les personnes à arrêter de fumer. Cela permettra d'améliorer la prise en charge et l'accompagnement des fumeurs qui souhaitent arrêter de fumer, et ce, au niveau national.

### 1.6. CONTRAINTES

---

Aucune contrainte si ce n'est la passation des questionnaires, et devoir revenir pour le suivi.

### 1.7. RISQUES PREVISIBLES

---

Le mésusage de certains produits utilisés pour l'arrêt du tabac comme la cigarette électronique pourrait engendrer un risque grave sur votre santé. Tous les outils utilisés pour l'arrêt du tabac devraient être utilisés selon les recommandations de votre médecin.

### 1.8. DROIT D'ETRE INFORME(E) DES RESULTATS GLOBAUX

---

Vous avez le droit d'être informé des résultats globaux de cette recherche à l'issue de celle-ci, conformément au dernier alinéa de l'article L.1122-1 du Code de la Santé Publique auprès de l'investigateur ou de son représentant désigné qui aura recueilli votre consentement.

Les résultats de cette étude seront communiqués à tous les participants par voie d'affichage dans chacune des structures de santé faisant partie de l'étude, ainsi que par les médecins. Elles seront aussi diffusées par le site web de l'équipe Sorbonne université (ERES, UMR\_S 1136) en charge de l'étude ([www.iplesp.upmc.fr/eres/](http://www.iplesp.upmc.fr/eres/)).

Les résultats de cette recherche peuvent également être présentés à des congrès ou dans des publications scientifiques. Cependant, vos données personnelles ne seront aucunement identifiables car elles auront été préalablement rendues confidentielles grâce à un codage particulier qui ne mentionne ni votre nom, ni votre prénom.

### 1.9. CONFIDENTIALITE ET TRAITEMENTS DES DONNEES A CARACTERE PERSONNEL

---

Dans le cadre de la recherche impliquant la personne humaine à laquelle une société savante de médecins et des chercheur.se.s en santé publique de la Sorbonne université vous propose de participer, un traitement de vos données personnelles va être mis en œuvre pour permettre d'analyser les résultats de la recherche au regard de l'objectif de cette dernière. Le promoteur et les investigatrices conservent les documents relatifs à la recherche, qui leur sont spécifiques pendant une durée de 15 ans dans un lieu sécurisé, accessible aux seules personnes autorisées.

#### **Vos droits**

Conformément à l'article 13 du Règlement Général sur la Protection des Données (Règlement (UE) 2016/679), vous disposez des droits suivants :  
avez le droit:

- d'accéder à l'ensemble de vos données personnelles
- de demander la rectification ou la suppression de celles-ci
- de demander une limitation du traitement de vos données
- de vous opposer au traitement d'une partie ou de la totalité de vos données
- de récupérer l'ensemble des données vous concernant en vue de les transmettre à un autre responsable de traitement (droit à la portabilité)
- le droit de retirer, à tout moment, vos données à la collecte de vos données. Si au cours de la recherche vous souhaitez ne plus y participer, les données vous concernant et acquises avant le retrait de votre

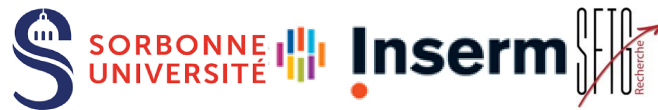

consentement seront exploitées par l'investigateur ou son représentant désigné, sauf si vous vous y opposez. Dans ce cas ces dernières seront détruites.

Vous disposez également du droit d'introduire une réclamation auprès de la Commission Nationale de l'Informatique et des Libertés – CNIL (autorité française de contrôle des données personnelles – [www.cnil.fr](http://www.cnil.fr)).

Pour exercer l'ensemble de ces droits, vous pouvez contacter le responsable du traitement des données (Tarik El Aarbaoui) ainsi que l'équipe investigatrice à l'adresse [etude.stop@gmail.com](mailto:etude.stop@gmail.com) ou à : « Etude Stop, équipe ERES, - Institut Pierre Louis d'Epidémiologie et de Santé Publique (IPLESP UMRS 1136) - 27 rue Chaligny, 75012 Paris ».

#### **1.10. INDEMNITES**

---

Aucune indemnité n'est prévue pour la participation à cette recherche et aucun avantage financier ne peut être tiré de la participation à cette recherche.

#### **1.11. CADRE LEGISLATIF DE LA RECHERCHE IMPLIQUANT LA PERSONNE HUMAINE**

---

Cette recherche est réalisée conformément aux articles L1121-1 et suivants du Code de la Santé Publique, relatifs aux recherches impliquant la personne humaine. Elle a reçu l'avis favorable du Comité de Protection des Personnes XXXX. L'Agence Nationale de Sécurité du Médicament et des produits de Santé a été informée de sa réalisation.

Cette recherche est menée conformément à la méthodologie de référence MR 001 homologuée par la Commission Nationale de l'Informatique et des Libertés et à laquelle la SFTG s'est engagée à se conformer

Pour pouvoir participer à cette recherche impliquant la personne humaine, vous devez être affilié(e) à un régime de sécurité sociale ou à la Couverture Médicale Universelle (CMU) ou à tout régime équivalent.

Au cours ou en fin de recherche, des assistants de recherche clinique et des auditeurs mandatés par le promoteur, ainsi que des inspecteurs des autorités de santé peuvent accéder aux seules fins de vérification des données recueillies par l'investigateur ou son représentant désigné. Ils sont soumis au secret professionnel, c'est-à-dire au respect de la confidentialité de vos données personnelles.

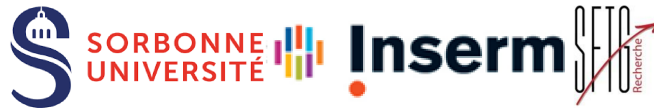

## 2. RECUEIL DU CONSENTEMENT DU (DE LA) PARTICIPANT(E)

J'atteste avoir bien lu et pris connaissance des informations relatives à ma participation à la recherche intitulée « **Sevrage Tabagique à l'aide des Outils dédiés selon la Préférence, un essai randomisé et contrôlé** » (STOP) exposées par écrit sur les pages précédentes et avoir été informé(e) de l'objectif de cette recherche par l'investigateur ou son représentant désigné, de la façon dont elle va être réalisée et de ce que ma participation va impliquer pour moi. J'ai obtenu toutes les réponses aux questions que je lui ai posées.

- J'ai bien compris les contraintes qui seront les miennes au cours ma participation à cette recherche
- J'ai compris qu'aucune donnée directement identifiante ne sera enregistrée, informatisée et par conséquence recueillie.
- J'ai compris que je peux retirer à tout moment mon consentement de participation à cette recherche quelles que soient mes raisons et sans avoir à m'en justifier, sans supporter aucune responsabilité et sans encourir aucun préjudice. J'en informerai simplement l'investigateur du centre ou l'équipe investigatrice.
- J'ai bien noté que – conformément au Règlement Général sur la Protection des Données – mon droit d'accès, de rectification, d'effacement, de portabilité, d'opposition et de limitation du traitement de mes données s'exerce à tout moment auprès de l'investigateur ou du responsable du traitement des données désigné.

### CONSENTEMENT RELATIF AUX DONNEES PERSONNELLES

J'accepte que les données me concernant, enregistrées à l'occasion de cette recherche, puissent faire l'objet d'un traitement informatique par le promoteur ou pour son compte.

|                                                                                                                                                                                                                                                                                                                                                                                                              |                                                                  |
|--------------------------------------------------------------------------------------------------------------------------------------------------------------------------------------------------------------------------------------------------------------------------------------------------------------------------------------------------------------------------------------------------------------|------------------------------------------------------------------|
| <p><b>A compléter de la main de la personne donnant son consentement :</b></p> <p>Je soussigné(e) _____ (Nom, Prénom)<br/>         accepte librement et volontairement de participer à la recherche décrite. Mon consentement ne décharge en rien l'investigateur ou son représentant désigné et le promoteur de l'ensemble de leurs responsabilités et je conserve tous mes droits garantis par la loi.</p> | <p>Le ___ / ___ / ____</p> <p>—<br/>Signature du participant</p> |
|--------------------------------------------------------------------------------------------------------------------------------------------------------------------------------------------------------------------------------------------------------------------------------------------------------------------------------------------------------------------------------------------------------------|------------------------------------------------------------------|

|                                                                                                                                                                                                                                                                                                                                                                                                                                                    |                                                                                                             |
|----------------------------------------------------------------------------------------------------------------------------------------------------------------------------------------------------------------------------------------------------------------------------------------------------------------------------------------------------------------------------------------------------------------------------------------------------|-------------------------------------------------------------------------------------------------------------|
| <p><b>A compléter par le médecin :</b></p> <p>Je soussigné (e), Docteur, _____ (Nom, Prénom)<br/>         confirme avoir expliqué le but et les modalités de cette recherche ainsi que ses risques potentiels. Je m'engage à faire respecter les termes de ce formulaire de consentement, conciliant le respect des droits et des libertés individuelles et les exigences d'un travail scientifique.</p> <p>Nom du service : _____ Tél : _____</p> | <p>Le ___ / ___ / ____</p> <p>—<br/>Signature de l'investigateur<br/>ou de son représentant<br/>désigné</p> |
|----------------------------------------------------------------------------------------------------------------------------------------------------------------------------------------------------------------------------------------------------------------------------------------------------------------------------------------------------------------------------------------------------------------------------------------------------|-------------------------------------------------------------------------------------------------------------|

Etablir le document en deux exemplaires originaux.

Exemplaire participant : à remettre à la personne se prêtant à la recherche

Exemplaire investigateur : à conserver par l'Investigateur pendant la durée légale de conservation des documents de la recherche.
